# Supplementary material for: Detection of early primary colorectal cancer with upconversion luminescent NP-based molecular probes
Source: Royal Society of Chemistry journal article supplement (doi:10.1039/c5nr07858j), 2015-11-30
Supplement: c5nr07858j1.pdf [file c5nr07858j1.pdf]

Supplementary Information

Detection of Early Primary Colorectal Cancer with Upconversion  
Luminescence NPs-Based Molecular Probes †

Chunyan Liu,<sup>a,‡</sup> Yifei Qi,<sup>b,‡</sup> Ruirui Qiao,<sup>a</sup> Yi hou,<sup>a</sup> Jiaying Chen,<sup>b</sup> Ziqian Li,<sup>b</sup> Jiayi  
Huang,<sup>a</sup> Lihong Jing,<sup>a</sup> Jun Du,<sup>b,\*</sup> and Mingyuan Gao<sup>a,\*</sup>

<sup>a</sup>*Institute of Chemistry, Chinese Academy of Sciences, Bei Yi Jie 2, Zhong Guan Cun,  
Beijing 100190, China,* <sup>b</sup>*School of Pharmaceutical Sciences, Sun Yat-sen University,  
Guangzhou 510006, China.*

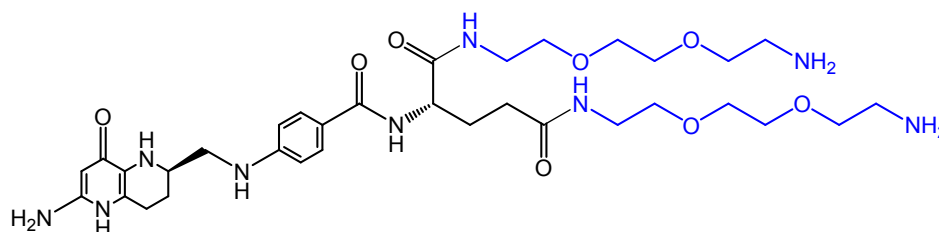

Fig. S1. Molecular structure of highly water-soluble Jaffamine-modified folic acid that is a customized products provided by Beijing Oneder Hightech Co. Ltd.

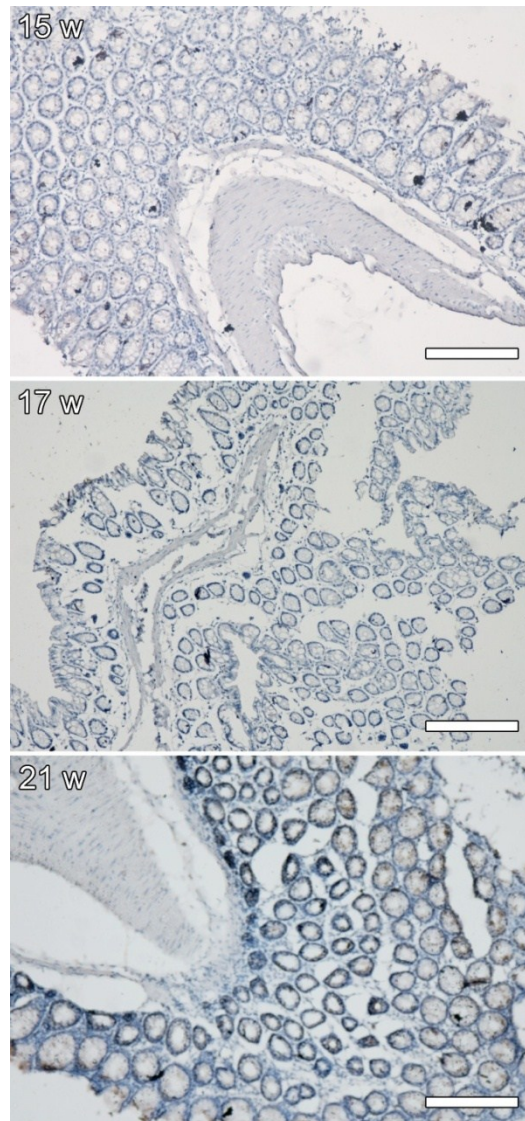

Fig. S2. Immunohistochemical analysis of FR expression (brown color) in colorectal tissue derived from mice treated by NaCl at different weeks. The scale bars correspond to 200  $\mu$ m.

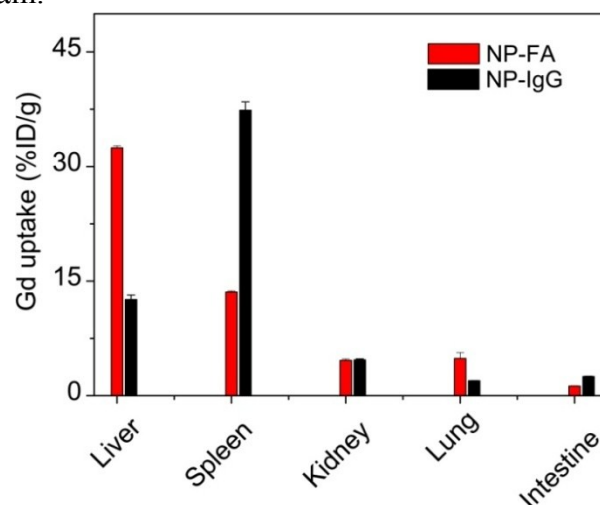

Fig. S3. Biodistributions of probes of NP-FA and NP-IgG in main organs of mice determined at 6 h postinjection.
